# Supplementary material
Source: Royal Society of Chemistry journal article supplement (doi:10.1039/d5lc01050k)
Supplement: d5lc01050k1.xlsx [file d5lc01050k1.xlsx]

## Sheet: Study #1
								Turbidity	Total Cell Density	Viable Cell Density	Cell Viability					AAV qPCR
Operation	Sample ID	Sample Details/Testing	Process Date	Volume Processed (mL)	Percentage Processed (%)	Process Volume Remaining before sample (mL)	Volume Collected in Fraction (mL)	NTUs	Total Cells/mL (x10^6)	Viable Cells/mL (x10^6)	(%)	Total cells in fraction (x10^6)	Percentage of total cells in fraction (%)	Cumulative Percentage of Cell Breakthrough (%)	Cell Clarification Efficiency (%)	AAV qPCR (vg/mL)	Total AAV in fraction (vg)	Percentage of total AAV in fraction (%)	Cumulative Percentage of AAV Recovery (%)	AAV divided by cells in fraction (vg/cell)	Normalized AAV divided by cells in fraction ()	Cumulative Total Harvest Cell Density (M/mL)	Cumulative total AAVs (vg)		Percentage Processed Range (%-%)	Percentage of total cells in fraction (%)	Percentage of total AAV in fraction (%)			Sample Source (up to % process complete)	Cumulative Normalized AAV/cell ratio	This is cumulative because it goes from 0 - x%, normalized because it is a fold-increase in AAV/cell over baseline
Outward Outlet	OW - T1	T1	2023-01-30	20	4	500	15	329	0.0399937	0.00821179	20.5128	0.599906	0.080167	0.080167	99.114	14746837000	221202555000	2.95415	2.95415	368729	51.0869	0.0399937	221202555000		0%-20%	0.39056	14.8976			Outward Outlet (up to 20%)	52.8814
	OW - T2	T2		40	8	480	15	322	0.0399937	0.0164136	41.0256	0.599906	0.080167	0.160334	98.8204	15583473000	233752095000	3.12175	6.07589	389648	53.9853	0.0399937	454954650000		20%-40%	0.548799	15.2521			Outward Outlet (up to 40%)	44.4964
	OW - T3	T3		60	12	460	15	349	0.0266658	0.00616134	23.0769	0.399987	0.0534514	0.213785	99.2565	15816502000	237247530000	3.16843	9.24432	593138	82.1785	0.0355511	692202180000		40%-60%	0.80979	16.23			Outward Outlet (up to 60%)	36.7599
	OW - T4	T4		80	16	440	15	329	0.0410189	0.00923701	22.5	0.615284	0.0822221	0.296008	98.9239	14076992500	211154887500	2.81996	12.0643	343183	47.5476	0.036918	903357067500		60%-80%	1.78273	16.0974			Outward Outlet (up to 70%)	30.7345
	OW - T5	T5		100	20	420	15	347	0.0471703	0.0123127	26.087	0.707554	0.0945524	0.39056	98.8269	14143731500	212155972500	2.83333	14.8976	299844	41.543	0.0389685	1115513040000		80%-100%	17.697	16.386			Outward Outlet (up to 80%)	24.5238
	OW - T6	T6		120	24	400	15	359	0.0440946	0.0143631	32.5581	0.661419	0.0883872	0.478947	98.9443	14868076500	223021147500	2.97843	17.876	337186	46.7167	0.0398228	1338534187500		Material Left Behind and not Harvested	78.7711	21.1369			Outward Outlet (up to 90%)	9.93314
	OW - T7	T7		140	28	380	15	357	0.0533216	0.0164136	30.7692	0.799824	0.106883	0.58583	98.6321	15430259500	231453892500	3.09105	20.9671	289381	40.0934	0.0417512	1569988080000		Sum	100	100			Outward Outlet (All)	5.15015
	OW - T8	T8		160	32	360	15	368	0.0420442	0.0133379	31.7073	0.630662	0.0842771	0.670107	98.9981	14650307000	219754605000	2.93481	23.9019	348450	48.2774	0.0417878	1789742685000
	OW - T9	T9		180	36	340	15	366	0.0584477	0.0256406	43.8596	0.876716	0.117158	0.787265	98.5542	14848376500	222725647500	2.97449	26.8764	254045	35.1977	0.0436389	2012468332500
	OW - T10	T10		200	40	320	15	384	0.0758765	0.0215397	28.3784	1.13815	0.152094	0.939359	98.0837	16339866000	245097990000	3.27327	30.1497	215348	29.8362	0.0468627	2257566322500							Flask (up to 20%)	0.817101
	OW - T11	T11		220	44	300	15	377	0.0717756	0.0133379	18.5714	1.07663	0.143874	1.08323	98.2896	19664616500	294969247500	3.9393	34.089	273973	37.9587	0.0491275	2552535570000							Inward Outlet (up to 20%)	0.637721
	OW - T12	T12		240	48	280	15	387	0.0604982	0.0194892	32.2034	0.907473	0.121268	1.2045	98.605	15433463500	231501952500	3.09169	37.1807	255106	35.3447	0.0500751	2784037522500							Flask (up to 40%)	0.78858
	OW - T13	T13		260	52	260	15	401	0.0810026	0.018464	22.7848	1.21504	0.162369	1.36687	98.2817	14468991000	217034865000	2.89849	40.0791	178624	24.7481	0.0524541	3001072387500							Inward Outlet (up to 40%)	0.60434
	OW - T14	T14		280	56	240	15	402	0.0984314	0.027691	28.125	1.47647	0.197305	1.56417	98.0322	15178015000	227670225000	3.04052	43.1197	154199	21.3641	0.0557382	3228742612500							Flask (up to 60%)	0.67945
	OW - T15	T15		300	60	220	15	426	0.0922801	0.0256406	27.7778	1.3842	0.184975	1.74915	98.1724	16273729500	244105942500	3.26002	46.3797	176351	24.4333	0.0581743	3472848555000							Inward Outlet (up to 60%)	0.577104
	OW - T16	T16		320	64	200	15	441	0.141581	0.0287163	20.2899	2.12371	0.283797	2.03295	97.4003	15565548500	233483227500	3.11815	49.4978	109941	15.2322	0.0633872	3706331782500							Flask (up to 80%)	0.608539
	OW - T17	T17		340	68	180	15	461	0.13953	0.0256406	18.3824	2.09296	0.279687	2.31263	97.1611	15187714000	227815710000	3.04247	52.5403	108849	15.0809	0.0678662	3934147492500							Inward Outlet (up to 80%)	0.53622
	OW - T18	T18		360	72	160	15	472	0.132354	0.0317919	24.031	1.98531	0.265302	2.57794	97.6169	16673622500	250104337500	3.34013	55.8804	125978	17.4541	0.0714489	4184251830000							Flask (All)	0.552159
	OW - T19	T19		380	76	140	15	505	0.225649	0.0328171	14.5455	3.38474	0.452312	3.03025	95.9968	17449224500	261738367500	3.4955	59.3759	77329	10.7138	0.0795647	4445990197500							Inward Outlet (All)	0.490323
	OW - T20	T20		400	80	120	15	537	0.250254	0.0420442	16.8033	3.75382	0.501633	3.53188	95.6412	15480773500	232211602500	3.10117	62.4771	61860.1	8.57064	0.0880992	4678201800000
	OW - T21	T21		420	84	100	15	848	0.854111	0.0799774	9.36375	12.8117	1.71206	5.24394	86.5197	15381935500	230729032500	3.08137	65.5585	18009.3	2.49517	0.124576	4908930832500
	OW - T22*	T22		440	88	80	15	1000	1.3616	0.123127	9.03614	20.4239	2.72931	7.97325	78.7711	15928426500	238926397500	3.19085	68.7493	11698.3	1.62079	0.180804	5147857230000
	OW - T23*	T23		460	92	60	15	1000	1.8455	0.129278	7	27.6825	3.69929	11.6725	72.8168	16285533500	244283002500	3.26238	72.0117	8824.45	1.22262	0.253182	5392140232500
	OW - T24*	T24		480	96	40	15	1000	2.25354	0.165161	7.32484	33.8031	4.5172	16.1897	65.8474	17291420000	259371300000	3.46389	75.4756	7673	1.06308	0.336531	5651511532500
	OW - T25*	T25		500	100	20	15	1000	2.51395	0.160035	6.36215	37.7092	5.03919	21.2289	62.2818	16910331500	253654972500	3.38755	78.8631	6726.6	0.931963	0.423627	5905166505000
Flask	Flask - T1	T1	2023-01-30	20	4	500	2.5		4.51416	0.144656	3.20236	11.2854				34929017500	87322543750			7737.66	1.07204
	Flask - T2	T2		40	8	480	2.5		3.39051	0.096381	2.84246	8.47628				17213480000	43033700000			5076.95	0.703406
	Flask - T3	T3		60	12	460	2.5		3.58633	0.101597	2.83019	8.96583				20657538500	51643846250			5760.08	0.798052
	Flask - T4	T4		80	16	440	2.5		3.81188	0.118001	3.09306	9.5297				19342132000	48355330000			5074.17	0.70302
	Flask - T5	T5		100	20	420	2.5		4.02103	0.16106	4.00306	10.0526				21821914500	54554786250			5426.95	0.751898
	Flask - T6	T6		120	24	400	2.5		4.17686	0.124152	2.97005	10.4421				22038296500	55095741250			5276.28	0.731023
	Flask - T7	T7		140	28	380	2.5		3.898	0.1139	2.91952	9.745				29265821500	73164553750			7507.91	1.04021
	Flask - T8	T8		160	32	360	2.5		4.19634	0.150808	3.5915	10.4908				24419607500	61049018750			5819.26	0.806252
	Flask - T9	T9		180	36	340	2.5		4.04256	0.156959	3.88029	10.1064				18784666500	46961666250			4646.73	0.643799
	Flask - T10	T10		200	40	320	2.5		3.95951	0.136455	3.44381	9.89878				16903294000	42258235000			4269.03	0.59147
	Flask - T11	T11		220	44	300	2.5		4.19634	0.169262	4.03127	10.4908				15503037000	38757592500			3694.42	0.511857
	Flask - T12	T12		240	48	280	2.5		4.33679	0.160035	3.68794	10.842				17351858000	43379645000			4001.08	0.554345
	Flask - T13	T13		260	52	260	2.5		4.71408	0.155934	3.30579	11.7852				14772285500	36930713750			3133.65	0.434164
	Flask - T14	T14		280	56	240	2.5		5.00216	0.198993	3.97622	12.5054				17935414000	44838535000			3585.53	0.496771
	Flask - T15	T15		300	60	220	2.5		5.04932	0.178489	3.53299	12.6233				17506165500	43765413750			3467.03	0.480353
	Flask - T16	T16		320	64	200	2.5		5.44609	0.234876	4.31099	13.6152				18704740500	46761851250			3434.53	0.47585
	Flask - T17	T17		340	68	180	2.5		4.91502	0.192842	3.92157	12.2876				18140627500	45351568750			3690.86	0.511363
	Flask - T18	T18		360	72	160	2.5		5.55373	0.2277	4.09821	13.8843				15685786000	39214465000			2824.37	0.391313
	Flask - T19	T19		380	76	140	2.5		5.63678	0.252305	4.47435	14.0919				17315353500	43288383750			3071.85	0.425602
	Flask - T20	T20		400	80	120	2.5		5.74135	0.25128	4.375	14.3534				17839742500	44599356250			3107.24	0.430504
	Flask - T21	T21		420	84	100	2.5		6.33598	0.291263	4.59547	15.8399				16903994500	42259986250			2667.94	0.369639
	Flask - T22	T22		440	88	80	2.5		6.4139	0.281011	4.3798	16.0347				16463329000	41158322500			2566.82	0.35563
	Flask - T23	T23		460	92	60	2.5		6.78913	0.315869	4.65116	16.9728				24419607500	61049018750			3596.87	0.498342
	Flask - T24	T24		480	96	40	2.5		6.59844	0.27691	4.19515	16.4961				18344085500	45860213750			2780.07	0.385175
	Flask - T25	T25		500	100	20	2.5		6.66508	0.309717	4.64544	16.6627				17895743500	44739358750			2685	0.372004
	Leftovers	-		500	100	0	88.44		6.66508	0.309717	4.64544	589.459	78.7711			17895743500	1582699555140	21.1369		2685	0.372004
Inward Outlet	IW - T1	T1	2023-01-30	20	4	500	2.5		3.29619	0.0994567	3.01711	8.24048				16067176500	40167941250			4874.46	0.675351
	IW - T2	T2		40	8	480	2.5		3.18854	0.0933053	2.92604	7.97136				15059563500	37648908750			4723.02	0.654369
	IW - T3	T3		60	12	460	2.5		3.2029	0.106723	3.32907	8.00724				15814619000	39536547500			4937.6	0.684098
	IW - T4	T4		80	16	440	2.5		3.39666	0.107748	3.16933	8.49166				17703206000	44258015000			5211.94	0.722108
	IW - T5	T5		100	20	420	2.5		4.2476	0.114925	2.70336	10.619				15131845000	37829612500			3562.45	0.493573
	IW - T6	T6		120	24	400	2.5		3.45818	0.114925	3.32049	8.64545				15426919000	38567297500			4461	0.618066
	IW - T7	T7		140	28	380	2.5		3.86827	0.134404	3.47204	9.67067				16206529500	40516323750			4189.61	0.580465
	IW - T8	T8		160	32	360	2.5		3.695	0.138505	3.74584	9.23751				18335286000	45838215000			4962.18	0.687504
	IW - T9	T9		180	36	340	2.5		4.39728	0.144656	3.28748	10.9932				15420255500	38550638750			3506.77	0.485859
	IW - T10	T10		200	40	320	2.5		4.10817	0.155934	3.79336	10.2704				15610142000	39025355000			3799.78	0.526455
	IW - T11	T11		220	44	300	2.5		4.42394	0.168237	3.8007	11.0598				17092070500	42730176250			3863.54	0.535289
	IW - T12	T12		240	48	280	2.5		4.17994	0.144656	3.45843	10.4498				19405871500	48514678750			4642.62	0.64323
	IW - T13	T13		260	52	260	2.5		4.54594	0.176438	3.87912	11.3649				17437954000	43594885000			3835.94	0.531465
	IW - T14	T14		280	56	240	2.5		4.49365	0.149783	3.33105	11.2341				16069738500	40174346250			3576.1	0.495464
	IW - T15	T15		300	60	220	2.5		4.73663	0.190792	4.02597	11.8416				15969444000	39923610000			3371.48	0.467114
	IW - T16	T16		320	64	200	2.5		4.96116	0.207195	4.17442	12.4029				18218969500	45547423750			3672.32	0.508796
	IW - T17	T17		340	68	180	2.5		5.1867	0.215397	4.15102	12.9668				16946006000	42365015000			3267.2	0.452667
	IW - T18	T18		360	72	160	2.5		5.17953	0.207195	3.99842	12.9488				17168202500	42920506250			3314.63	0.459238
	IW - T19	T19		380	76	140	2.5		5.84695	0.236927	4.0505	14.6174				16860238000	42150595000			2883.6	0.399519
	IW - T20	T20		400	80	120	2.5		5.83362	0.260507	4.46397	14.5841				17854051500	44635128750			3060.54	0.424035
	IW - T21	T21		420	84	100	2.5		6.18732	0.279986	4.52361	15.4683				16651774000	41629435000			2691.27	0.372873
	IW - T22	T22		440	88	80	2.5		6.05302	0.277936	4.59011	15.1325				15977545000	39943862500			2639.6	0.365713
	IW - T23	T23		460	92	60	2.5		6.25601	0.295364	4.71976	15.64				16845064500	42112661250			2692.62	0.373059
	IW - T24	T24		480	96	40	2.5		6.68251	0.305617	4.57195	16.7063				19426380000	48565950000			2907.05	0.402768
	IW - T25	T25		500	100	20	2.5		7.40529	0.359953	4.85948	18.5132				17843001500	44607503750			2409.49	0.333833
	-	-					588.44					1352.88	100	100			9764614538890	100		7217.67	1

## Sheet: Study #2
								Turbidity	Total Cell Density	Viable Cell Density	Cell Viability					AAV qPCR
Operation	Sample ID	Sample Details/Testing	Process Date	Volume Processed (mL)	Percentage Processed (%)	Process Volume Remaining before sample (mL)	Volume Collected in Fraction (mL)	NTUs	Total Cells/mL (x10^6)	Viable Cells/mL (x10^6)	(%)	Total cells in fraction (x10^6)	Percentage of total cells in fraction (%)	Cumulative Percentage of Cell Breakthrough (%)	Cell Clarification Efficiency (%)	AAV qPCR (vg/mL)	Total AAV in fraction (vg)	Percentage of total AAV in fraction (%)	Cumulative Percentage of AAV Recovery (%)	AAV divided by cells in fraction (vg/cell)	Normalized AAV divided by cells in fraction ()	Cumulative Total Harvest Cell Density (M/mL)	Cumulative total AAVs (vg)		Percentage Processed Range (%-%)	Percentage of total cells in fraction (%)	Percentage of total AAV in fraction (%)			Sample Source (up to % process complete)	Cumulative Normalized AAV/cell ratio	This is cumulative because it goes from 0 - x%, normalized because it is a fold-increase in AAV/cell over baseline							Estimated Cell Density		y=a*e^(bx) + c Model				Values in red are determined by a curve fit to predict what the total cell density would have been
Outward Outlet	OW - T1	T1	2023-03-28	20	2.5	800	18	301	0.044	0.006	14	0.792	0.0895914	0.0895914	98.3643	178675170500	3216153069000	2.5765	2.5765	4.0608e+06	36.7559	0.044	3216153069000		0%-20%	0.637716	18.9098			Outward Outlet (up to 20%)	37.8985								0.03626		a	0.003318
	OW - T2	T2		40	5	780	18		0.031	0.007	23.3	0.558	0.0631212	0.152713	98.8686	184728765500	3325117779000	2.6638	5.2403	5.95899e+06	53.9372	0.0375	6541270848000		20%-40%	0.890311	18.332			Outward Outlet (up to 40%)	31.1503								0.0368721		b	0.059073
	OW - T3	T3		60	7.5	760	18		0.035	0.006	18	0.63	0.0712659	0.223978	98.7544	165517195500	2979309519000	2.38676	7.62706	4.72906e+06	42.8046	0.0366667	9520580367000		40%-60%	1.70881	18.3297			Outward Outlet (up to 60%)	21.9429								0.0375816		c	0.032414
	OW - T4	T4		80	10	740	18		0.038404			0.691272	0.078197	0.302175	98.642	145531215500	2619561879000	2.09857	9.72563	3.78948e+06	34.3001	0.037101	12140142246000		60%-80%	4.37776	17.7526			Outward Outlet (up to 70%)	16.9202								0.038404
	OW - T5	T5		100	12.5	720	18	322	0.0393573			0.708431	0.080138	0.382313	98.63	123657325500	2225831859000	1.78314	11.5088	3.14192e+06	28.4388	0.0375523	14365974105000		80%-100%	16.4522	15.7034			Outward Outlet (up to 80%)	12.3073								0.0393573
	OW - T6	T6		120	15	700	18		0.0404623			0.728321	0.082388	0.464701	98.6143	182265994500	3280787901000	2.62828	14.1371	4.50459e+06	40.7729	0.0380373	17646762006000		Material Left Behind and not Harvested	75.9332	10.9725			Outward Outlet (up to 90%)	7.67599								0.0404623
	OW - T7	T7		140	17.5	680	18		0.0417431			0.751376	0.084996	0.549697	98.5944	163458265000	2942248770000	2.35707	16.4941	3.91581e+06	35.4436	0.0385667	20589010776000		Sum	100	100			Outward Outlet (All)	4.7279								0.0417431
	OW - T8	T8		160	20	660	18		0.0432278			0.7781	0.088019	0.637716	98.5697	167520885500	3015375939000	2.41566	18.9098	3.87531e+06	35.0769	0.0391493	23604386715000																0.0432278
	OW - T9	T9		180	22.5	640	18		0.0449487			0.809077	0.0915232	0.72924	98.5395	158700562000	2856610116000	2.28847	21.1983	3.5307e+06	31.9578	0.0397937	26460996831000																0.0449487
	OW - T10	T10		200	25	620	18	343	0.0469436			0.844985	0.095585	0.824825	98.503	163860136000	2949482448000	2.36287	23.5611	3.49058e+06	31.5946	0.0405087	29410479279000							Flask (up to 20%)	0.388343								0.0469436
	OW - T11	T11		220	27.5	600	18		0.0492559			0.886606	0.100293	0.925118	98.4595	161523385000	2907420930000	2.32917	25.8903	3.27927e+06	29.682	0.0413039	32317900209000							Flask (up to 40%)	0.387242								0.0492559
	OW - T12	T12		240	30	580	18		0.0519362			0.934852	0.105751	1.03087	98.408	130166195500	2342991519000	1.877	27.7673	2.50627e+06	22.6853	0.0421899	34660891728000							Flask (up to 60%)	0.366019								0.0519362
	OW - T13	T13		260	32.5	560	18		0.0550431			0.990775	0.112077	1.14295	98.3474	153739542500	2767311765000	2.21693	29.9842	2.79308e+06	25.2813	0.0431786	37428203493000							Flask (up to 80%)	0.334482								0.0550431
	OW - T14	T14		280	35	540	18		0.0586444			1.0556	0.11941	1.26236	98.2765	179369842500	3228657165000	2.58652	32.5707	3.0586e+06	27.6847	0.0442833	40656860658000							Flask (All)	0.29654								0.0586444
	OW - T15	T15		300	37.5	520	18	357	0.0628188			1.13074	0.12791	1.39026	98.1942	169086968000	3043565424000	2.43824	35.009	2.69166e+06	24.3633	0.045519	43700426082000																0.0628188
	OW - T16	T16		320	40	500	18	370	0.0676575			1.21784	0.137762	1.52803	98.0989	154839619000	2787113142000	2.23279	37.2418	2.28858e+06	20.7148	0.0469027	46487539224000																0.0676575
	OW - T17	T17		340	42.5	480	18	372	0.0732664			1.31879	0.149183	1.67721	97.989	166128053000	2990304954000	2.39557	39.6374	2.26745e+06	20.5236	0.0484535	49477844178000																0.0732664
	OW - T18	T18		360	45	460	18	387	0.0797678			1.43582	0.162421	1.83963	97.8628	167154291000	3008777238000	2.41037	42.0477	2.09551e+06	18.9673	0.0501932	52486621416000																0.0797678
	OW - T19	T19		380	47.5	440	18	388	0.0873039			1.57147	0.177765	2.0174	97.7182	162871188500	2931681393000	2.34861	44.3963	1.86557e+06	16.886	0.0521464	55418302809000																0.0873039
	OW - T20	T20		400	50	420	18	391	0.0960394			1.72871	0.195552	2.21295	97.5532	141432022000	2545776396000	2.03946	46.4358	1.47265e+06	13.3295	0.054341	57964079205000																0.0960394
	OW - T21	T21		420	52.5	400	18	396	0.106165			1.91097	0.21617	2.42912	97.3653	156543223000	2817778014000	2.25736	48.6931	1.47453e+06	13.3465	0.0568088	60781857219000																0.106165
	OW - T22	T22		440	55	380	18	408	0.117902			2.12224	0.240068	2.66919	97.1518	154044097500	2772793755000	2.22132	50.9145	1.30654e+06	11.826	0.0595858	63554650974000																0.117902
	OW - T23	T23		460	57.5	360	18	412	0.131507			2.36713	0.26777	2.93696	96.9097	152528955500	2745521199000	2.19947	53.1139	1.15985e+06	10.4983	0.0627128	66300172173000																0.131507
	OW - T24	T24		480	60	340	18	421	0.147277			2.65099	0.299881	3.23684	96.6358	170423195500	3067617519000	2.45751	55.5715	1.15716e+06	10.4739	0.0662363	69367789692000																0.147277
	OW - T25	T25		500	62.5	320	18	426	0.16	0.021	11.7	2.88	0.325787	3.56262	96.4286	197423167000	3553617006000	2.84685	58.4183	1.23389e+06	11.1685	0.0699869	72921406698000																0.165557
	OW - T26	T26		520	65	300	18	445	0.19	0.028	14.3	3.42	0.386872	3.9495	95.8785	158209211000	2847765798000	2.28138	60.6997	832680	7.53692	0.0746028	75769172496000																0.186746
	OW - T27	T27		540	67.5	280	18	459	0.22	0.021	9.2	3.96	0.447957	4.39745	95.5375	141562890000	2548132020000	2.04134	62.741	643468	5.82428	0.0799878	78317304516000																0.211307
	OW - T28	T28		560	70	260	18	479	0.25	0.029	11.3	4.5	0.509042	4.90649	94.856	153535928000	2763646704000	2.21399	64.955	614144	5.55886	0.0860597	81080951220000																0.239777
	OW - T29	T29		580	72.5	240	18	498	0.26	0.032	12.3	4.68	0.529404	5.4359	94.8718	116096363000	2089734534000	1.67411	66.6291	446524	4.04167	0.0920576	83170685754000																0.272778
	OW - T30	T30		600	75	220	18	517	0.3	0.033	10.9	5.4	0.61085	6.04675	94.3182	134281910000	2417074380000	1.93635	68.5655	447606	4.05146	0.0989891	85587760134000																0.311031
	OW - T31	T31		620	77.5	200	18	532	0.36	0.038	10.5	6.48	0.73302	6.77977	93.3702	175919649500	3166553691000	2.53677	71.1023	488666	4.42311	0.107409	88754313825000																0.355371
	OW - T32	T32		640	80	180	18	538	0.41	0.039	9.5	7.38	0.834829	7.6146	92.7305	154079039000	2773422702000	2.22183	73.3241	375803	3.40154	0.116865	91527736527000																0.406768
	OW - T33	T33		660	82.5	160	18	607	0.48	0.04	8.3	8.64	0.97736	8.59196	91.8089	175676267000	3162172806000	2.53326	75.8573	365992	3.31274	0.127869	94689909333000
	OW - T34	T34		680	85	140	18	641	0.77	0.07	9	13.86	1.56785	10.1598	86.927	133866829000	2409602922000	1.93036	77.7877	173853	1.57361	0.146755	97099512255000
	OW - T35	T35		700	87.5	120	18	697	0.9	0.081	9	16.2	1.83255	11.9924	85.5538	138654570000	2495782260000	1.9994	79.7871	154061	1.39446	0.168276	99595294515000
	OW - T36	T36		720	90	100	18	739	0.79	0.074	9.4	14.22	1.60857	13.6009	87.7138	131585070000	2368531260000	1.89746	81.6846	166563	1.50763	0.185546	101963825775000
	OW - T37	T37		740	92.5	80	18	797	0.88	0.065	7.3	15.84	1.79183	15.3928	87.0398	117528640000	2115515520000	1.69477	83.3793	133555	1.20886	0.204315	104079341295000
	OW - T38	T38		760	95	60	18	884	1.07	0.086	8	19.26	2.1787	17.5715	85.0559	122209125000	2199764250000	1.76226	85.1416	114214	1.0338	0.227097	106279105545000
	OW - T39	T39		780	97.5	40	18	922	1.29	0.098	7.6	23.22	2.62666	20.1981	82.4251	131822311500	2372801607000	1.90088	87.0425	102188	0.924943	0.254351	108651907152000
	OW - T40	T40		800	100	20	18	1000	1.9	0.12	6.5	34.2	3.86872	24.0668	74.7004	137658987000	2477861766000	1.98505	89.0275	72452.1	0.655793	0.295492	111129768918000
Flask	Initial Flask	-	2023-03-28	0	0	800			3.77	0.063	1.7	0				129369150000
	Flask - T1	T1		20	2.5	800	2		2.69	0.07	2.6	5.38				114673324000	229346648000			42629.5	0.385857																		2.70707		y=a*e^(bx) + c Model
	Flask - T2	T2		40	5	780	2		2.74	0.069	2.5	5.48				131769447000	263538894000			48091	0.435291																		2.74528		a	0.667577
	Flask - T3	T3		60	7.5	760	2		2.81	0.078	2.8	5.62				110092976000	220185952000			39179	0.354625																		2.78557		b	0.021148
	Flask - T4	T4		80	10	740	2		2.82804			5.65608				105328660000	210657320000			37244.4	0.337114																		2.82804		c	2.00325
	Flask - T5	T5		100	12.5	720	2		2.87282			5.74564				125283353500	250566707000			43609.9	0.394731																		2.87282
	Flask - T6	T6		120	15	700	2		2.92003			5.84006				110562738000	221125476000			37863.5	0.342718																		2.92003
	Flask - T7	T7		140	17.5	680	2		2.96981			5.93961				143431153500	286862307000			48296.5	0.437151																		2.96981
	Flask - T8	T8		160	20	660	2		3.02228			6.04457				139347109000	278694218000			46106.6	0.417329																		3.02228
	Flask - T9	T9		180	22.5	640	2		3.07761			6.15522				160340234000	320680468000			52099	0.471569																		3.07761
	Flask - T10	T10		200	25	620	2		3.13594			6.27188				159096375000	318192750000			50733.2	0.459207																		3.13594
	Flask - T11	T11		220	27.5	600	2		3.19744			6.39487				167403883500	334807767000			52355.7	0.473892																		3.19744
	Flask - T12	T12		240	30	580	2		3.26227			6.52454				128727261000	257454522000			39459.4	0.357163																		3.26227
	Flask - T13	T13		260	32.5	560	2		3.33063			6.66126				118824082000	237648164000			35676.2	0.322919																		3.33063
	Flask - T14	T14		280	35	540	2		3.4027			6.80539				128817637000	257635274000			37857.5	0.342664																		3.4027
	Flask - T15	T15		300	37.5	520	2		3.47867			6.95735				138242866000	276485732000			39740.1	0.359704																		3.47867
	Flask - T16	T16		320	40	500	2		3.55878			7.11756				127108961000	254217922000			35717	0.323289																		3.55878
	Flask - T17	T17		340	42.5	480	2		3.64323			7.28647				116197058000	232394116000			31893.9	0.288685																		3.64323
	Flask - T18	T18		360	45	460	2		3.73227			7.46455				126893093000	253786186000			33998.9	0.307737																		3.73227
	Flask - T19	T19		380	47.5	440	2		3.82615			7.65229				151735836000	303471672000			39657.6	0.358957																		3.82615
	Flask - T20	T20		400	50	420	2		3.92512			7.85023				171023315000	342046630000			43571.5	0.394383																		3.92512
	Flask - T21	T21		420	52.5	400	2		4.02946			8.05892				148402036500	296804073000			36829.3	0.333356																		4.02946
	Flask - T22	T22		440	55	380	2		4.13947			8.27894				137267995500	274535991000			33160.8	0.300152																		4.13947
	Flask - T23	T23		460	57.5	360	2		4.25545			8.5109				171378851000	342757702000			40272.8	0.364525																		4.25545
	Flask - T24	T24		480	60	340	2		4.37773			8.75545				152647156000	305294312000			34869	0.315614																		4.37773
	Flask - T25	T25		500	62.5	320	2		4.48	0.13	2.9	8.96				153629383000	307258766000			34292.3	0.310393																		4.50664
	Flask - T26	T26		520	65	300	2		4.61	0.16	3.5	9.22				159242508000	318485016000			34542.8	0.312661																		4.64256
	Flask - T27	T27		540	67.5	280	2		4.93	0.16	3.3	9.86				185787882000	371575764000			37685.2	0.341104																		4.78586
	Flask - T28	T28		560	70	260	2		4.86	0.14	2.8	9.72				152190187000	304380374000			31314.9	0.283443																		4.93693
	Flask - T29	T29		580	72.5	240	2		5.07	0.18	3.5	10.14				142707543500	285415087000			28147.4	0.254774																		5.09621
	Flask - T30	T30		600	75	220	2		5.28	0.18	3.3	10.56				127922880000	255845760000			24227.8	0.219296																		5.26413
	Flask - T31	T31		620	77.5	200	2		5.43	0.17	3.1	10.86				144078590000	288157180000			26533.8	0.240168																		5.44117
	Flask - T32	T32		640	80	180	2		5.64	0.17	3.1	11.28				140663140000	281326280000			24940.3	0.225744																		5.62783
	Flask - T33	T33		660	82.5	160	2		5.86	0.19	3.3	11.72				152107726000	304215452000			25956.9	0.234947
	Flask - T34	T34		680	85	140	2		5.89	0.2	3.3	11.78				249875992000	499751984000			42423.8	0.383995
	Flask - T35	T35		700	87.5	120	2		6.23	0.2	3.1	12.46				163461039000	326922078000			26237.7	0.237488
	Flask - T36	T36		720	90	100	2		6.43	0.23	3.5	12.86				153141078000	306282156000			23816.7	0.215574
	Flask - T37	T37		740	92.5	80	2		6.79	0.25	3.7	13.58				119448923000	238897846000			17591.9	0.159231
	Flask - T38	T38		760	95	60	2		7.16	0.26	3.6	14.32				141504980500	283009961000			19763.3	0.178885
	Flask - T39	T39		780	97.5	40	2		7.34	0.29	4	14.68				133301608000	266603216000			18161	0.164382
	Flask - T40	T40		800	100	20	2		7.51	0.31	4.1	15.02				121005113000	242010226000			16112.5	0.145841
	Leftovers	-		800	100	0	88.44		7.59	0.31	4	671.26	75.9332			154868110000	13696535648400	10.9725		20404.2	0.184687
	-	-					888.44					1233.49	100	100			136275632515400	100		110480	1

## Sheet: Study #3
								Turbidity	Total Cell Density	Viable Cell Density	Cell Viability					AAV qPCR
Operation	Sample ID	Sample Details/Testing	Process Date	Volume Processed (mL)	Percentage Processed (%)	Process Volume Remaining before sample (mL)	Volume Collected in Fraction (mL)	NTUs	Total Cells/mL (x10^6)	Viable Cells/mL (x10^6)	(%)	Total cells in fraction (x10^6)	Percentage of total cells in fraction (%)	Cumulative Percentage of Cell Breakthrough (%)	Cell Clarification Efficiency (%)	AAV qPCR (vg/mL)	Total AAV in fraction (vg)	Percentage of total AAV in fraction (%)	Cumulative Percentage of AAV Recovery (%)	AAV divided by cells in fraction (vg/cell)	Normalized AAV divided by cells in fraction ()	Cumulative Total Harvest Cell Density (M/mL)	Cumulative total AAVs (vg)		Percentage Processed Range (%-%)	Percentage of total cells in fraction (%)	Percentage of total AAV in fraction (%)			Sample Source (up to % process complete)	Cumulative Normalized AAV/cell ratio	This is cumulative because it goes from 0 - x%, normalized because it is a fold-increase in AAV/cell over baseline
Outward Outlet	OW - Bottle	Bottle	2023-08-11	250	52.0833	480	250	235	0.0523	0.0021	4.0153	13.075	1.7852	1.7852		63217591500	15804397875000	44.4949	44.4949	1.20875e+06	24.9244	0.0523	15804397875000		0%-50%	1.71379	42.7152			Outward Outlet (up to 50%)	24.9244
	OW - T1	T1		260	54.1667	230	10	271	0.0748	0.0031	4.14439	0.748	0.102128	1.88733		72834186000	728341860000	2.05054	46.5455	973719	20.078	0.0531654	16532739735000		50%-60%	0.515612	9.06092			Outward Outlet (up to 60%)	23.2242
	OW - T2	T2		270	56.25	220	10	276	0.0923	0.0021	2.27519	0.923	0.126022	2.01335		66219748500	662197485000	1.86432	48.4098	717440	14.7936	0.0546148	17194937220000		60%-70%	0.792588	9.09012			Outward Outlet (up to 66.7%)	21.1865
	OW - T3	T3		280	58.3333	210	10	280	0.082	0.0031	3.78049	0.82	0.111959	2.12531		65054460000	650544600000	1.83151	50.2413	793347	16.3588	0.0555929	17845481820000		70%-80%	1.17016	8.53048			Outward Outlet (up to 70%)	20.1411
	OW - T4	T4		290	60.4167	200	10	287	0.0953	0.0051	5.35152	0.953	0.130118	2.25543		68142212250	681422122500	1.91844	52.1598	715028	14.7439	0.0569621	18526903942500		80%-90%	4.06632	9.21309			Outward Outlet (up to 80%)	16.5539
	OW - T5	T5		300	62.5	190	10	290	0.1312	0.0062	4.72561	1.312	0.179134	2.43456		65312526500	653125265000	1.83878	53.9985	497809	10.2648	0.0594367	19180029207500		90%-100%	5.34358	8.90043			Outward Outlet (up to 90%)	9.51868
	OW - T6	T6		310	64.5833	180	10	294	0.0964	0.0062	6.43154	0.964	0.13162	2.56618		63675885500	636758855000	1.7927	55.7912	660538	13.6203	0.060629	19816788062500		Material Left Behind and not Harvested	86.3979	12.4898			Outward Outlet (all)	6.4336
	OW - T7	T7		320	66.6667	170	10	299	0.1097	0.0051	4.64904	1.097	0.149779	2.71596		62171905500	621719055000	1.75036	57.5416	566745	11.6863	0.0621625	20438507117500		Sum	100	100
	OW - T8	T8		330	68.75	160	10	308	0.1528	0.0072	4.71204	1.528	0.208626	2.92459		79747866500	797478665000	2.24518	59.7868	521910	10.7618	0.0649091	21235985782500
	OW - T9	T9		340	70.8333	150	10	315	0.1189	0.0062	5.21447	1.189	0.16234	3.08693		63900594500	639005945000	1.79903	61.5858	537431	11.0818	0.0664971	21874991727500
	OW - T10	T10		350	72.9167	140	10	326	0.1364	0.0072	5.27859	1.364	0.186234	3.27316		61239022500	612390225000	1.72409	63.3099	448966	9.25767	0.0684943	22487381952500		Conditions	Value
	OW - T11	T11		360	75	130	10	339	0.1804	0.0113	6.26386	1.804	0.24631	3.51947		63817690000	638176900000	1.79669	65.1066	353757	7.29445	0.0716028	23125558852500		Total volume with NTU < 300	320
	OW - T12	T12		370	77.0833	120	10	348	0.1845	0.0123	6.66667	1.845	0.251908	3.77138		69790513250	697905132500	1.96485	67.0714	378268	7.79988	0.0746541	23823463985000		Percentage of total volume with NTU < 300	0.666667
	OW - T13	T13		380	79.1667	110	10	359	0.2081	0.0113	5.43008	2.081	0.28413	4.05551		59306339750	593063397500	1.66968	68.7411	284990	5.87647	0.0781658	24416527382500		Recoverable vectors in sample with NTU < 300	20438507117500
	OW - T14	T14		390	81.25	100	10	371	0.2502	0.0051	2.03837	2.502	0.341611	4.39712		58212069250	582120692500	1.63887	70.38	232662	4.79748	0.0825769	24998648075000		Volume-weighted average titer	6.38703e+10
	OW - T15	T15		400	83.3333	90	10	393	0.3004	0.0113	3.76165	3.004	0.410152	4.80727		57968477500	579684775000	1.63202	72.012	192971	3.97905	0.0880225	25578332850000		HRC Filtrate titer	54211751000
	OW - T16	T16		410	85.4167	80	10	436	0.3701	0.0185	4.99865	3.701	0.505317	5.31259		82974868500	829748685000	2.33603	74.3481	224196	4.62291	0.0949024	26408081535000		Percentage recovery post-HRC	0.848778
	OW - T17	T17		420	87.5	70	10	742	1.1441	0.0277	2.42112	11.441	1.5621	6.87469		68007978000	680079780000	1.91466	76.2627	59442.3	1.2257	0.119883	27088161315000
	OW - T18	T18		430	89.5833	60	10	635	0.8837	0.0246	2.78375	8.837	1.20656	8.08125		69788685500	697886855000	1.9648	78.2275	78973.3	1.62843	0.137647	27786048170000
	OW - T19	T19		440	91.6667	50	10	580	0.649	0.0256	3.94453	6.49	0.886114	8.96737		67886262000	678862620000	1.91124	80.1388	104601	2.15687	0.149268	28464910790000
	OW - T20	T20		450	93.75	40	10	608	0.732	0.0287	3.92077	7.32	0.999439	9.96681		76528950000	765289500000	2.15456	82.2933	104548	2.15577	0.162218	29230200290000
	OW - T21	T21		460	95.8333	30	10	648	0.773	0.0185	2.39327	7.73	1.05542	11.0222		57249928000	572499280000	1.61179	83.9051	74062	1.52716	0.175496	29802699570000
	OW - T22	T22		470	97.9167	20	10	708	0.9483	0.0308	3.24792	9.483	1.29476	12.317		68590188000	685901880000	1.93106	85.8362	72329.6	1.49143	0.191938	30488601450000
	OW - T23	T23		480	100	10	10		0.9412	0.0338	3.59116	9.412	1.28507	13.6021		59460975000	594609750000	1.67404	87.5102	63175.7	1.30268	0.207548	31083211200000
Flask	Initial Flask	-	2023-08-11	0	0	480			1.7777	0.0666	3.74641	0				85278044250	0
	Leftovers	-		480	100	0	88.44		7.155	0.1364	1.90636	632.788	86.3979			50161926750	4436320801770	12.4898		7010.75	0.144561
	-	-					568.44					732.411	100	100			35519532001770	100		48496.7	1
HRC Filtrate	HRC Filtrate	HRC	2023-08-13				250									54211751000
