# Supplementary material
Source: Royal Society of Chemistry journal article supplement (doi:10.1039/d5lc01050k)

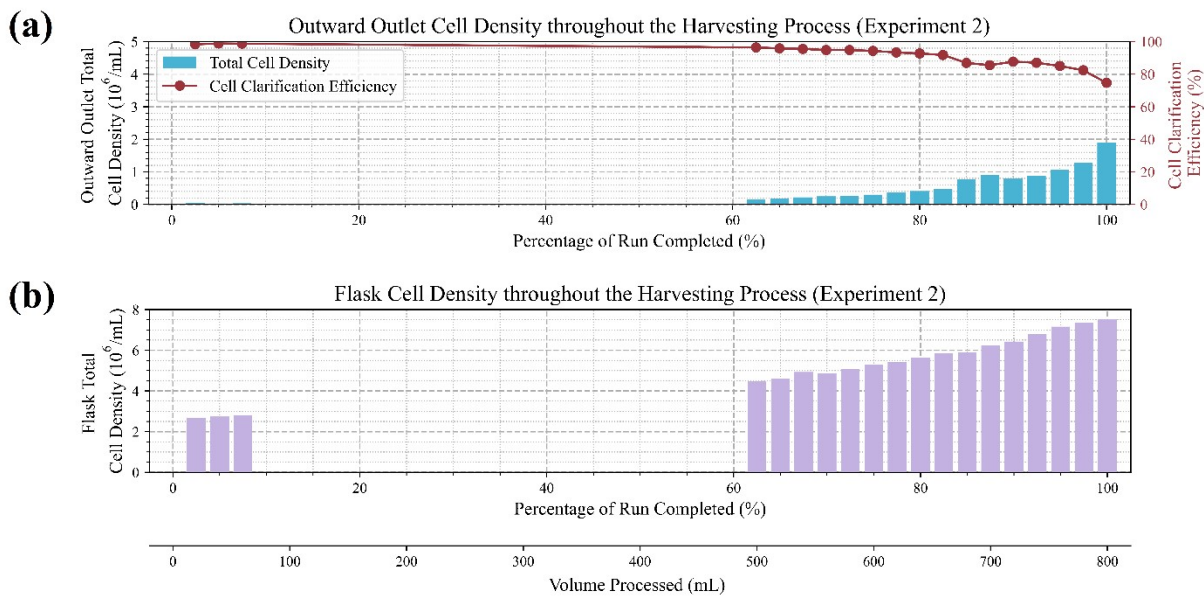

Figure s1

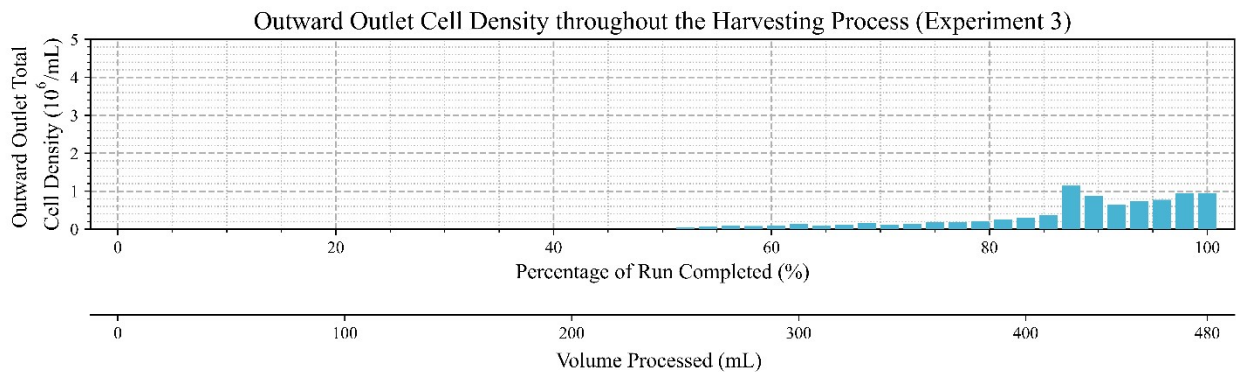

Figure s2

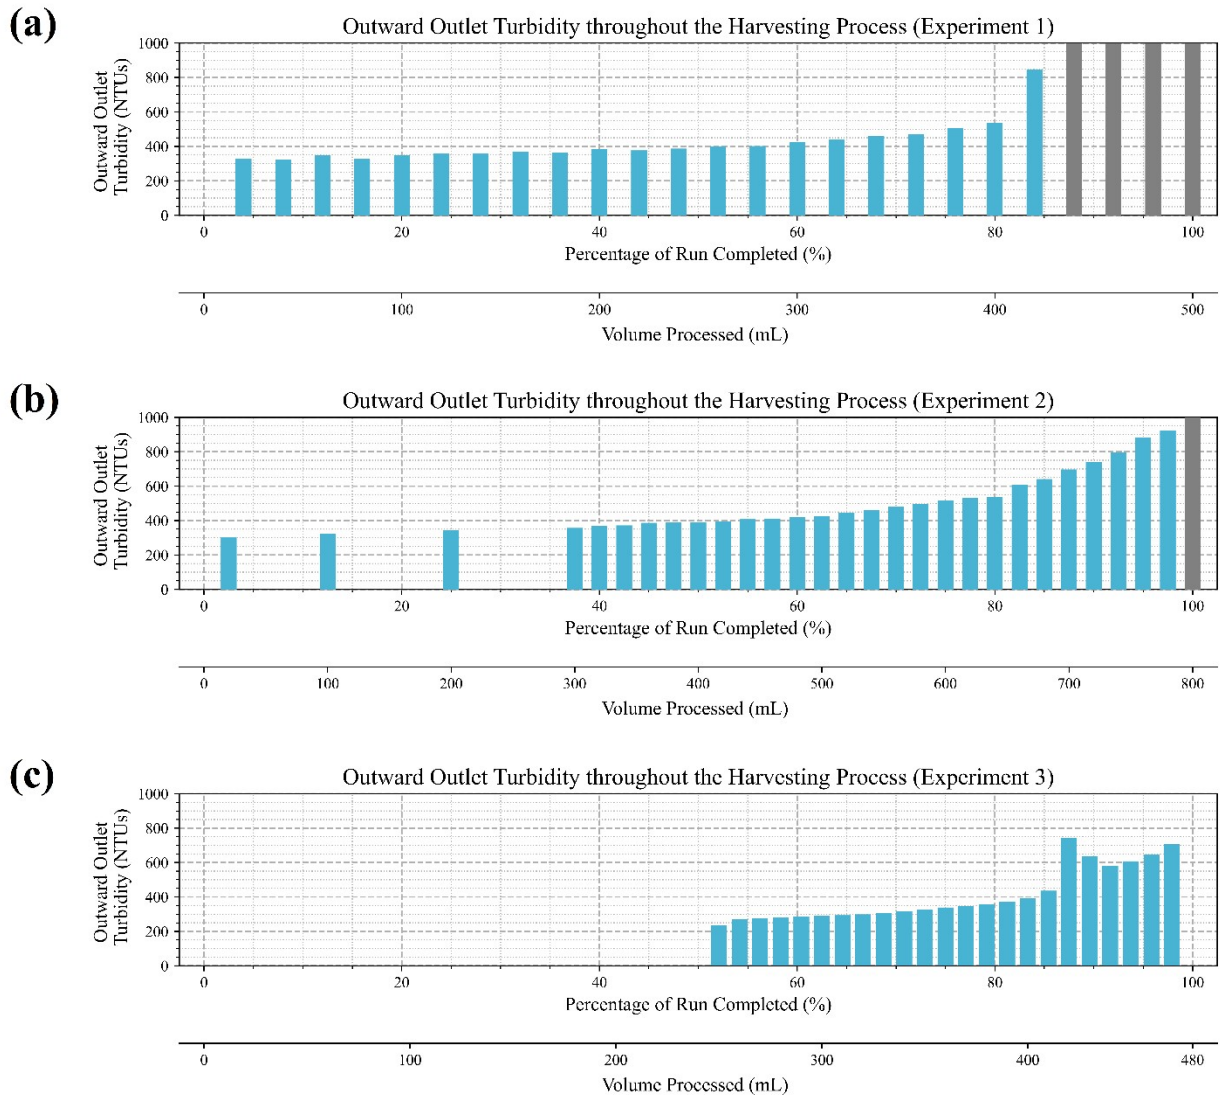

Figure s3

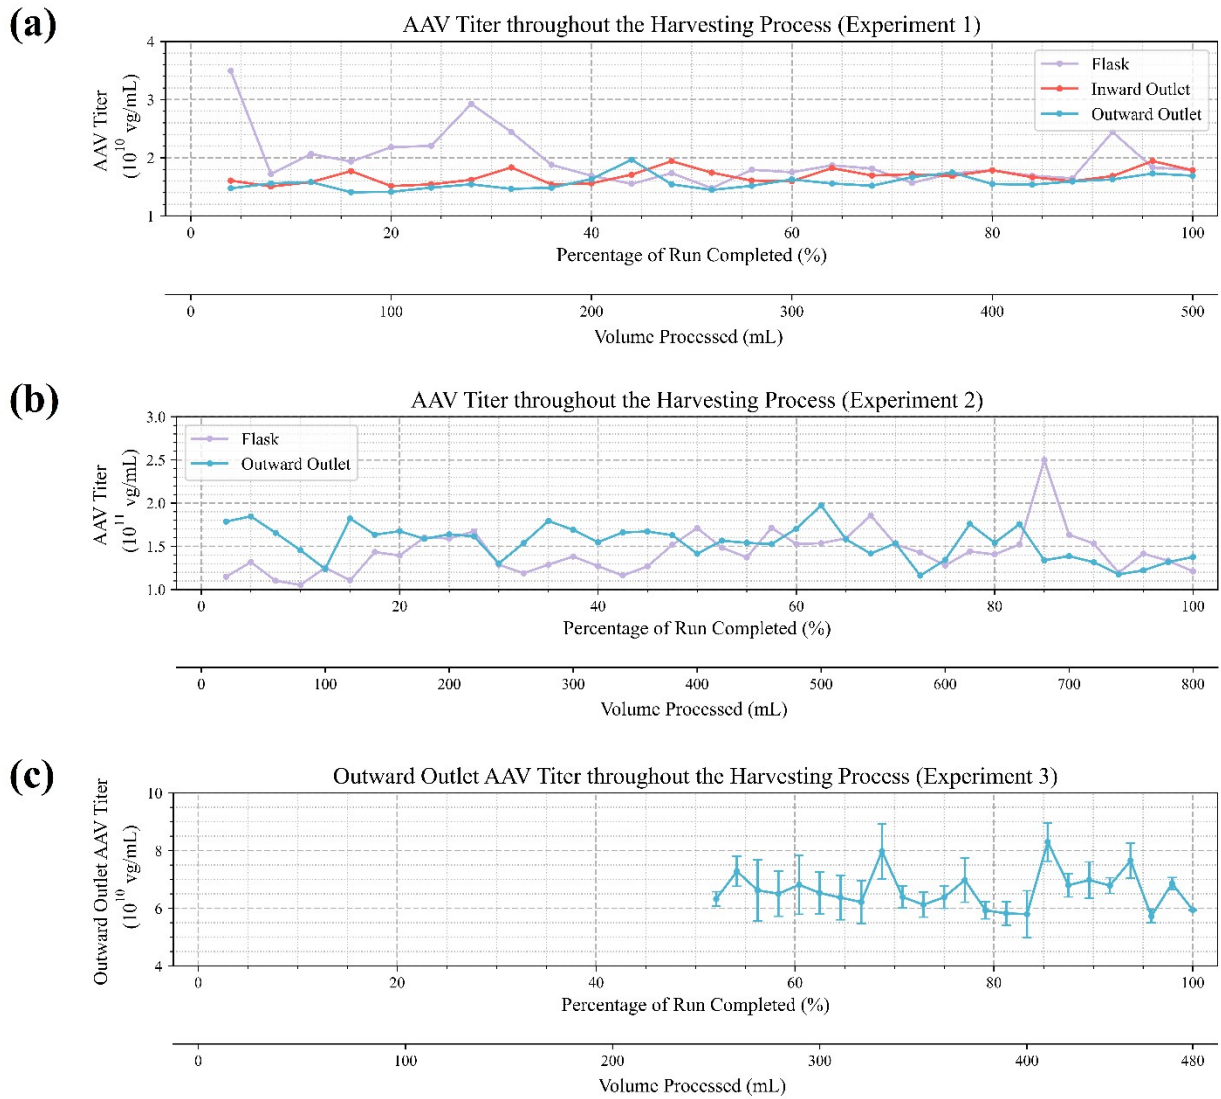

Figure s4

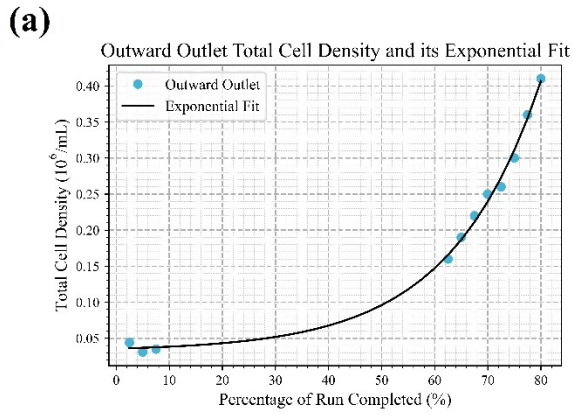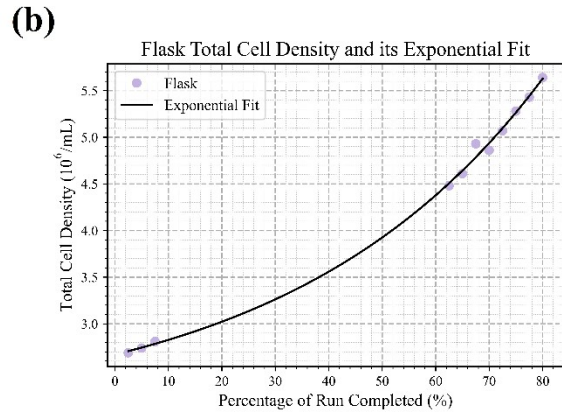

Figure s5

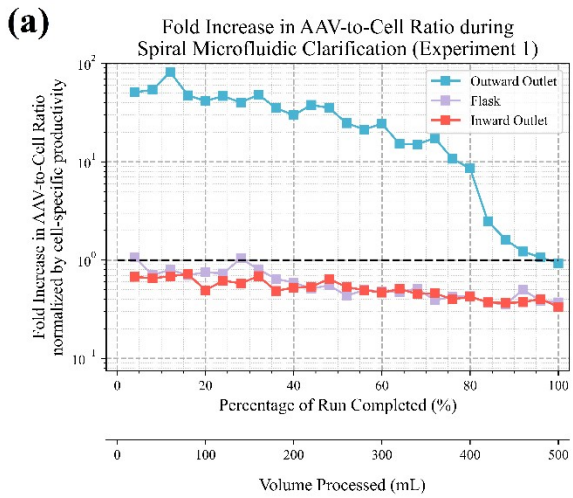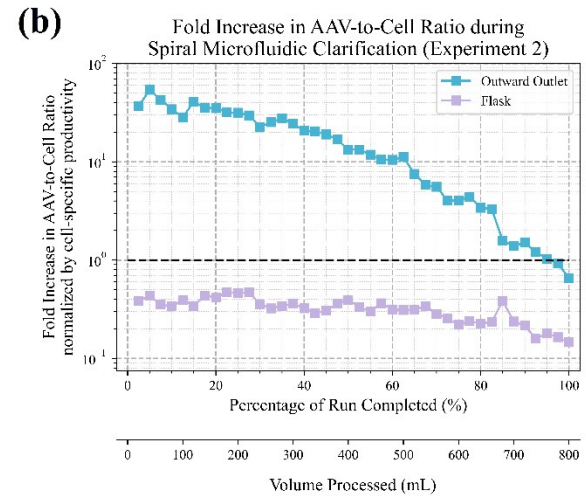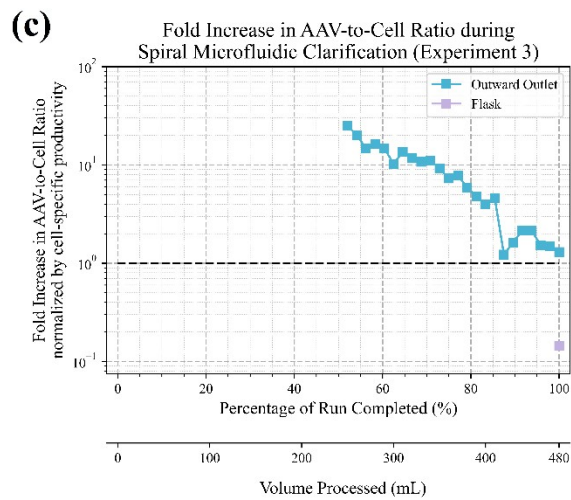

Figure s6

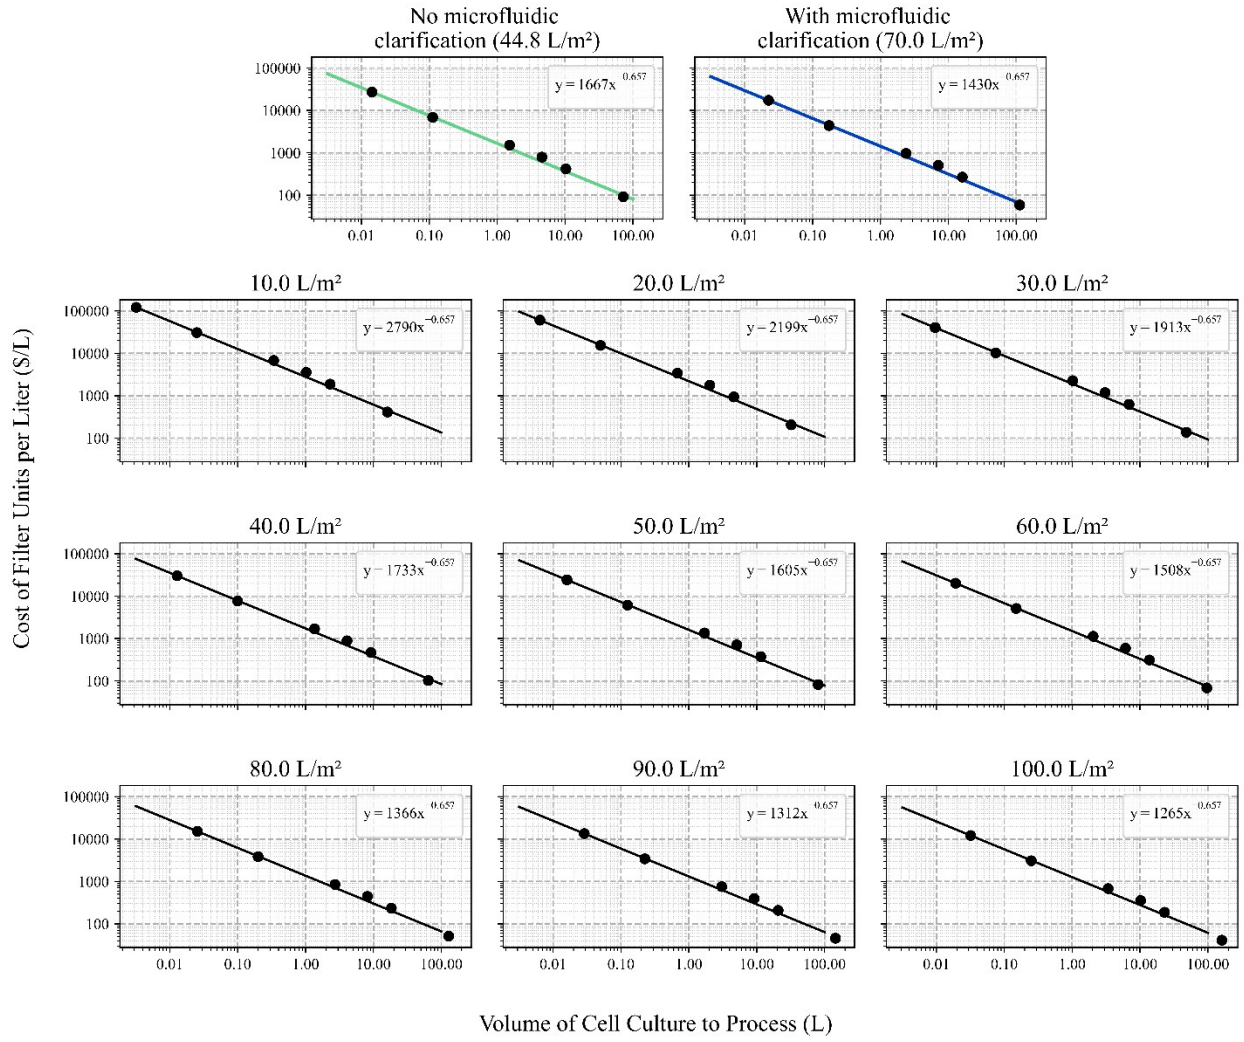

Figure s7

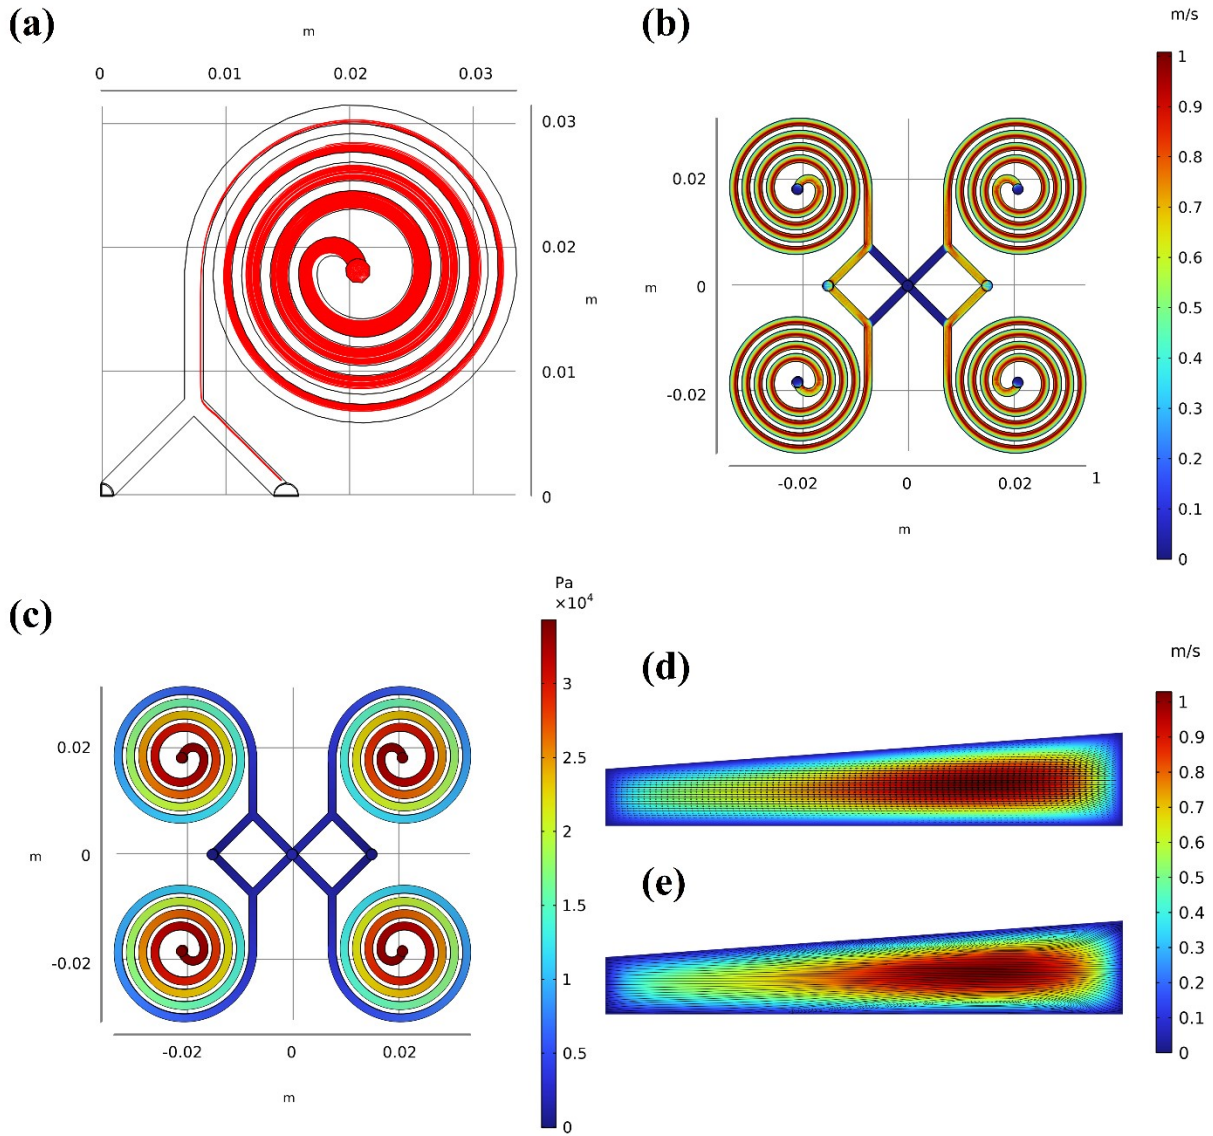

Figure s8

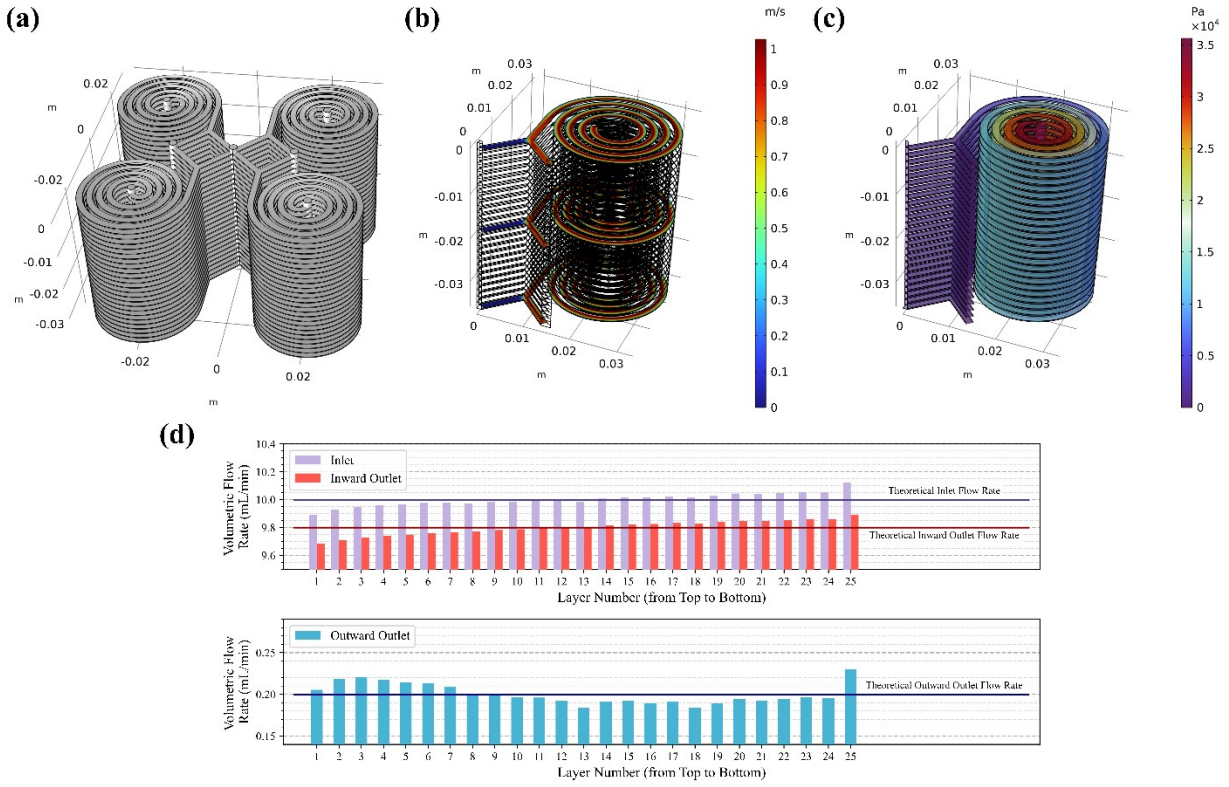

Figure s9

Supplement: d5lc01050k3.pdf [file d5lc01050k3.pdf]
